# Supplementary material for: Mechanical Dyssynchrony Combined with Septal Scarring Reliably Identifies Responders to Cardiac Resynchronization Therapy
Source: MDPI journal article supplement (doi:10.3390/jcm12186108), 2023-09-21
Supplement: s1 [file s1]

# Mechanical dyssynchrony combined with septal scarring reliably identifies responders to cardiac resynchronization therapy

Duchenne et al. Mechanical dyssynchrony and scarring in CRT

## SUPPLEMENTS: TABLES

Table S1: Frequency of mechanical dyssynchrony before CRT.

|                            | All patients<br>(n=170) | Responders<br>(n=121) | Non-<br>responders<br>(n=49) |
|----------------------------|-------------------------|-----------------------|------------------------------|
| SF or ApRock (%)           | 70                      | 86                    | 30 (*)                       |
| SSI $\geq$ 3.1% (%)        | 69                      | 80                    | 40 (*)                       |
| LW-S $\geq$ 860 mmHg·% (%) | 69                      | 80                    | 36 (*)                       |

(\*) = p<0.05 vs. responders.

Table S2: Predictors of CRT-response in only those patients with LBBB (n=148).

|                           | AUC  | 95%CI        |
|---------------------------|------|--------------|
| Markers                   |      |              |
| SF or ApRock              | 0.73 | 0.66 to 0.84 |
| SSI                       | 0.69 | 0.58 to 0.79 |
| LW-S work difference      | 0.76 | 0.65 to 0.86 |
| Markers + septal scarring |      |              |

|                                    |      |              |
|------------------------------------|------|--------------|
| SF or ApRock + septal scar         | 0.85 | 0.77 to 0.93 |
| SSI + septal scar                  | 0.82 | 0.74 to 0.89 |
| LW-S work difference + septal scar | 0.84 | 0.75 to 0.92 |

All  $p > 0.05$  vs. the same markers in the entire study cohort (n=170).
